# Supplementary material
Source: HighWire-hosted journal article supplement (https://www.life-science-alliance.org/content/3/10/e202000817)
Supplement: inline-supplementary-material-5 [file inline-supplementary-material-5.xlsx]

## Sheet: TableS2
Supplementary Table 2. The HRG associated SNPs that are non-synonymous or located near to transcription start site.
SNP	P value†	MAF‡	Coefficient (β) †	Amino-acid variants	Position in precursor
				[Codon]
rs9898	2.4 ´ 10‑97	0.32	0.15	Pro : Ser [CCC:TCC]	204
rs1042464	1.9 ´ 10‑44	0.47	0.1	Asn : Ile [AAT:ATT]	493
rs2228243	1.6 ´ 10‑34	0.2	0.11	His : Arg [CAT:CGT]	340
rs10770	3.9 ´ 10‑26	0.1	0.12	Ile : Thr [ATC:ACC]	180
rs3890864	6.6 ´ 10‑46	0.16	0.13	close to TSS‡
rs56376528	8.3 ´ 10‑46	0.16	0.13
† Results from the linear regression for allele frequency and HRG level
‡ MAF = minor allele frequency, TSS = transcription start site
